# Supplementary material for: Habitat and Season Drive Chigger Mite Diversity and Abundance on Small Mammals in Peninsular Malaysia
Source: MDPI journal article supplement (doi:10.3390/pathogens11101087), 2022-09-23
Supplement: s1 [file s1]

| Table of Contents                                                                                                            | Page<br>number |
|------------------------------------------------------------------------------------------------------------------------------|----------------|
| Table S1. Process IDs for <i>Rattus</i> sp. <i>coi</i> barcodes deposited in the Barcode of Life Data System (BOLD) database | 1              |
| Table S2. Small mammals captured at different habitat types                                                                  | 2              |
| Table S3. Chigger infestation status based on animal host species, sex and maturity                                          | 3              |
| Table S4. Number of small mammals with the indicated chigger species richness                                                | 4              |
| Table S5. Number of each small mammal species with chigger coinfection                                                       | 4              |
| Figure S1. Model-average importance of terms of independent variables explaining chigger abundance and species richness      | 5              |
| Table S6. Significant variables from best selected model for explaining chigger abundance                                    | 6              |
| Table S7. Significant variables from best selected model for explaining chigger species richness                             | 6              |
| Figure S2. Unipartite network models at host individual levels by state and season                                           | 7              |
| Table S8. Linkage density and V-ratio based on sampling site and season                                                      | 8              |
| Table S9. Prevalence of <i>Orientia tsutsugamushi</i> in small mammals from the Johor and Perak sites                        | 8              |

**Table S1. Process IDs for *Rattus* sp. *coi* barcodes deposited the Barcode of Life Data System (BOLD) database**

| <b>Sampling site</b> | <b>Process ID</b>         |
|----------------------|---------------------------|
| Johor                | UMNPA004-20 – UMNPA056-20 |
|                      | UMNPA058-20 – UMNPA068-20 |
| Perak                | UMNPA069-20               |
|                      | UMNPA071-20 – UMNPA076-20 |
|                      | UMNPA078-20 – UMNPA080-20 |
|                      | UMNPA082-20 – UMNPA083-20 |
|                      | UMNPA085-20               |
|                      | UMNPA087-20 – UMNPA091-20 |
|                      | UMNPA093-20 – UMNPA102-20 |
|                      | UMNPA161-20 – UMNPA194-20 |
|                      | UMNPA196-20 – UMNPA216-20 |
|                      | UMNPA218-20 – UMNPA223-20 |

**Table S2. Small mammals captured at different habitat types**

| <b>Habitat type</b> | <b>n</b> | <b>Animal</b>                      | <b>n</b> |
|---------------------|----------|------------------------------------|----------|
| Plantation          | 121      | <i>Rattus tanezumi</i> R3 mitotype | 78       |
|                     |          | <i>Tupaia glis</i>                 | 21       |
|                     |          | <i>Rattus tiomanicus</i>           | 12       |
|                     |          | <i>Rattus exulans</i>              | 7        |
|                     |          | <i>Rattus argentiventer</i>        | 3        |
| Human dwelling      | 47       | <i>Rattus tanezumi</i> R3 mitotype | 26       |
|                     |          | <i>Tupaia glis</i>                 | 13       |
|                     |          | <i>Rattus tiomanicus</i>           | 6        |
|                     |          | <i>Rattus exulans</i>              | 2        |
| Paddy field         | 26       | <i>Rattus argentiventer</i>        | 22       |
|                     |          | <i>Rattus exulans</i>              | 2        |
|                     |          | <i>Rattus tanezumi</i> R3 mitotype | 1        |
|                     |          | <i>Rattus tanezumi</i> s.s.        | 1        |
| Rubbish dumpsite    | 13       | <i>Rattus tanezumi</i> R3 mitotype | 10       |
|                     |          | <i>Tupaia glis</i>                 | 2        |
|                     |          | <i>Rattus exulans</i>              | 1        |
| Forest border       | 10       | <i>Rattus tiomanicus</i>           | 4        |
|                     |          | <i>Tupaia glis</i>                 | 4        |
|                     |          | <i>Rattus tanezumi</i> R3 mitotype | 1        |
|                     |          | <i>Rattus exulans</i>              | 1        |

**Table S3. Chigger infestation status based on animal host species, sex and maturity**

| <b>Host species</b>                | <b>Infestation rate</b> | <b>Mean chigger intensity</b> | <b>Median chigger intensity</b> | <b>Range</b> |
|------------------------------------|-------------------------|-------------------------------|---------------------------------|--------------|
| <i>Rattus tanezumi</i> R3 mitotype | 99/116 (85%)            | 282                           | 192                             | 5-1,511      |
| <i>Tupaia glis</i>                 | 36/40 (90%)             | 238                           | 94                              | 2-2,735      |
| <i>Rattus exulans</i>              | 8/13 (61%)              | 201                           | 139                             | 17-746       |
| <i>Rattus tiomanicus</i>           | 20/22 (91%)             | 117                           | 80                              | 3-477        |
| <i>Rattus argentiventer</i>        | 5/25 (20%)              | 63                            | 27                              | 1-156        |

  

| <b>Host gender</b> | <b>Infestation rate</b> | <b>Mean chigger intensity</b> | <b>Median chigger intensity</b> | <b>Range</b> |
|--------------------|-------------------------|-------------------------------|---------------------------------|--------------|
| Female             | 82/103 (80%)            | 278                           | 147                             | 1-2,735      |
| Male               | 87/114 (76%)            | 206                           | 141                             | 2-975        |

  

| <b>Host maturity</b> | <b>Infestation rate</b> | <b>Mean chigger intensity</b> | <b>Median chigger intensity</b> | <b>Range</b> |
|----------------------|-------------------------|-------------------------------|---------------------------------|--------------|
| Adult                | 119/149 (80%)           | 274                           | 146                             | 1-2,735      |
| Juvenile*            | 48/65 (74%)             | 164                           | 127                             | 6-731        |

  

| <b>Season</b> | <b>Infestation rate</b> | <b>Mean chigger intensity</b> | <b>Median chigger intensity</b> | <b>Range</b> |
|---------------|-------------------------|-------------------------------|---------------------------------|--------------|
| Dry           | 118/125 (94%)           | 292                           | 175                             | 3-2,735      |
| Wet           | 51/92 (55%)             | 124                           | 112                             | 1-588        |

\*Sub-adults and juveniles were combined into a single category for this analysis

**Table S4. Number of small mammals with the indicated chigger species richness**

| <b>Chigger species richness</b> | <b>Number</b> | <b>Percentage (%)*</b> |
|---------------------------------|---------------|------------------------|
| 1                               | 116           | 53.5                   |
| 2                               | 46            | 21.2                   |
| 3                               | 40            | 18.3                   |
| 4                               | 14            | 6.5                    |
| 5                               | 1             | 0.5                    |

\*Out of total number of small mammals (n=217)

**Table S5. Number of each small mammal species with chigger coinfection**

| <b>Host species</b>           | <b>Total</b> | <b>Number coinfecting</b> | <b>Percentage (%)</b> |
|-------------------------------|--------------|---------------------------|-----------------------|
| <i>Rattus argentiventer</i>   | 25           | 0                         | 0                     |
| <i>Rattus exulans</i>         | 13           | 7                         | 53.8                  |
| <i>Rattus phylogenetic R3</i> | 116          | 66                        | 56.9                  |
| <i>Rattus tanezumi</i>        | 1            | 0                         | 0                     |
| <i>Rattus tiomanicus</i>      | 22           | 11                        | 50.0                  |
| <i>Tupaia glis</i>            | 40           | 17                        | 42.5                  |

**A**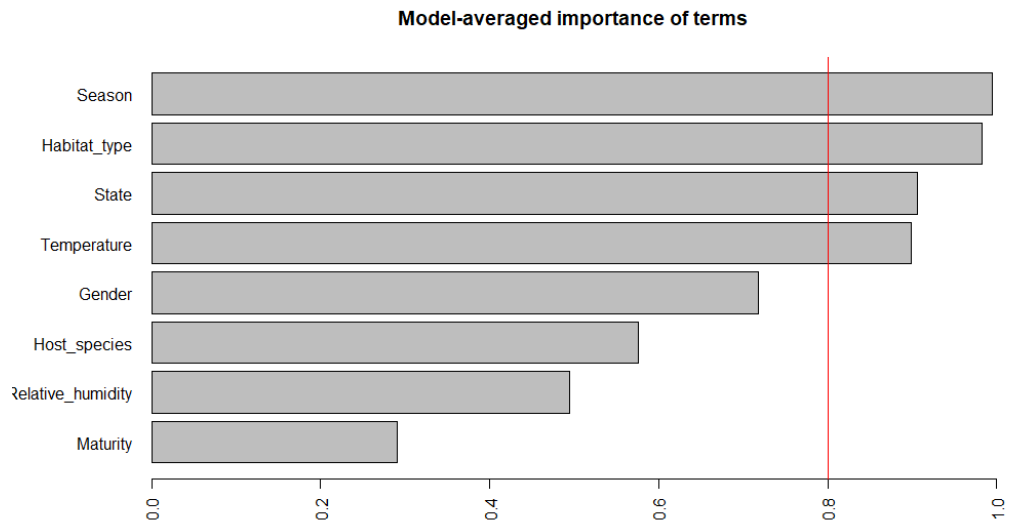**B**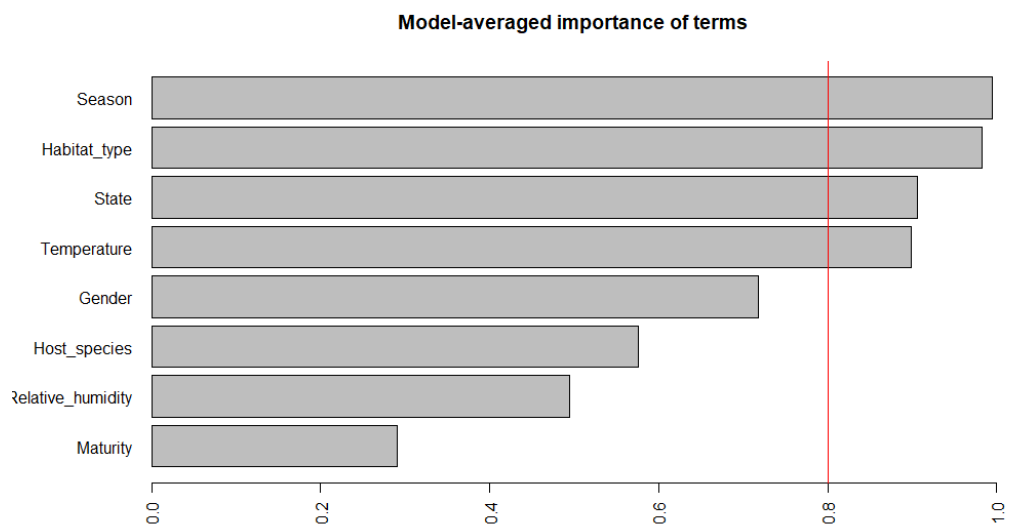

Figure S1. Model-average importance of terms of independent variables explaining chigger (a) abundance and (b) species richness. The variables with an importance score of >80% proportion support (x-axis, default in the “gmulti” package in R) were included in the final model.

**Table S6. Significant variables from best selected model for explaining chigger abundance**

| Parameters/effects                                                      | Log ratio<br>Chi-square | P-value | Variance<br>inflation factor |
|-------------------------------------------------------------------------|-------------------------|---------|------------------------------|
| Habitat_type***                                                         | 67.220                  | <0.001  | 1.529                        |
| Temperature                                                             | 0                       | 0.9845  | 1.075                        |
| Season***                                                               | 21.743                  | <0.001  | 1.112                        |
| State*                                                                  | 4.969                   | 0.0258  | 1.313                        |
| <b>Observation</b>                                                      |                         |         | 216                          |
| <b>Log-likelihood</b>                                                   |                         |         | -1191.987                    |
| <i>AICc</i>                                                             |                         |         | 2400                         |
| <b>The Goodness of Fit/Coefficient of determination (R<sup>2</sup>)</b> |                         |         | 0.9999761                    |

**Table S7. Significant variables from best selected model for explaining chigger species richness**

| Parameters/effects                                                      | Log ratio<br>Chi-square | P-value | Variance<br>inflation factor |
|-------------------------------------------------------------------------|-------------------------|---------|------------------------------|
| Habitat_type***                                                         | 56.053                  | <0.001  | 1.543                        |
| Relative_humidity*                                                      | 5.341                   | 0.0208  | 1.230                        |
| Season***                                                               | 35.594                  | <0.001  | 1.093                        |
| State***                                                                | 11.933                  | <0.001  | 1.286                        |
| <b>Observation</b>                                                      |                         |         | 216                          |
| <b>Log-likelihood</b>                                                   |                         |         | -285.057                     |
| <i>AICc</i>                                                             |                         |         | 586.115                      |
| <b>The Goodness of Fit/Coefficient of determination (R<sup>2</sup>)</b> |                         |         | 0.9999894                    |

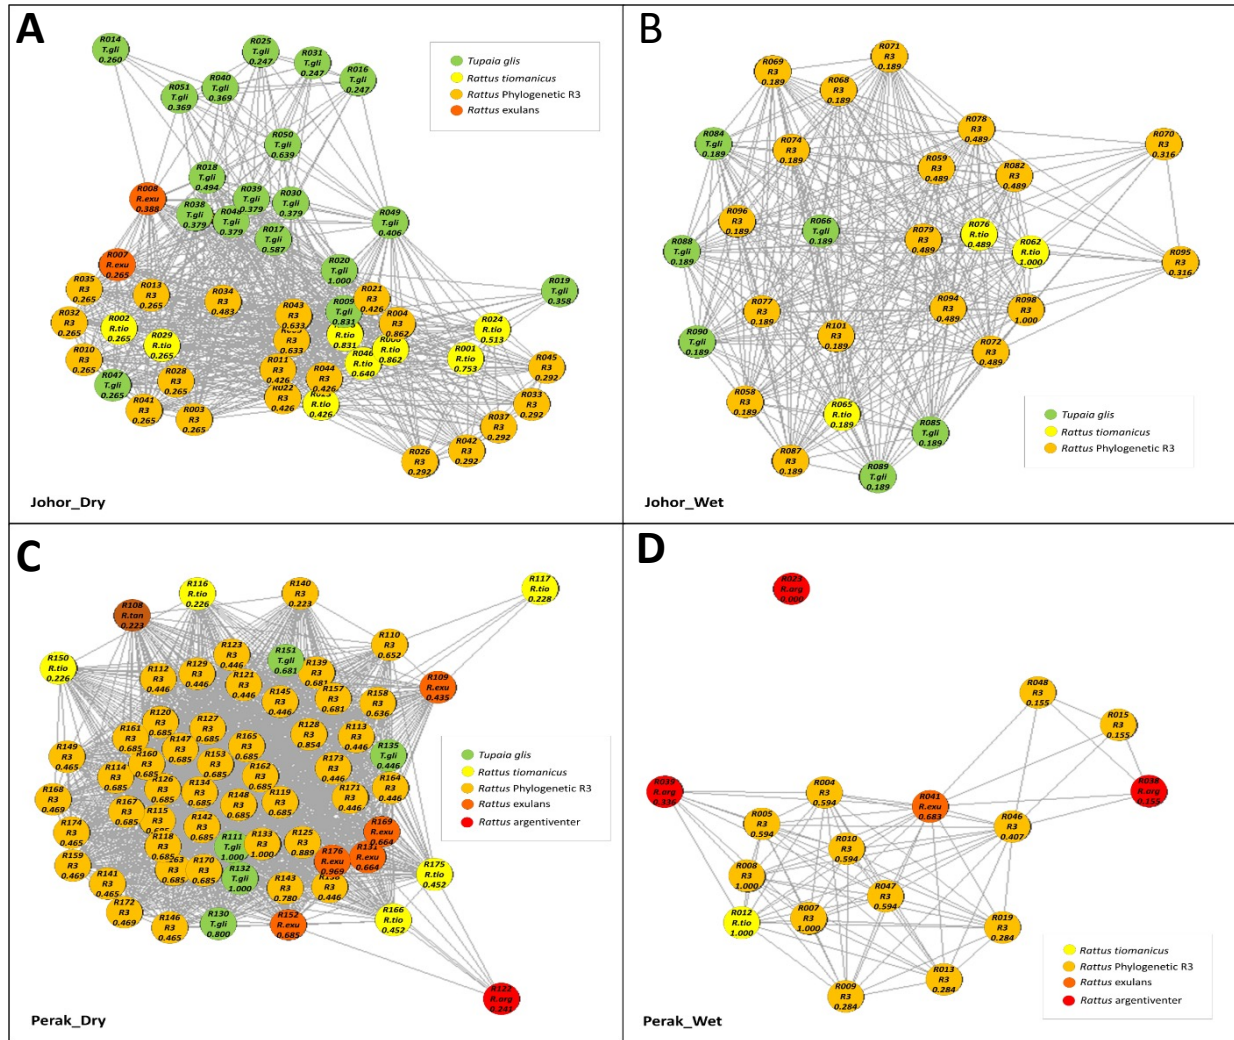

Figure S2. Unipartite network models at host individual levels by state and season. (a, b) Johor. (c, d) Perak. (a, c) Dry season. (b, d) Wet season.



**Table S8. Linkage density and V-ratio based on sampling site and season**

| Network parameters     | Johor/Dry<br>(n = 48) | Johor/Wet<br>(n = 27) | Perak/Dry<br>(n = 62) | Perak/Wet<br>(n = 17) |
|------------------------|-----------------------|-----------------------|-----------------------|-----------------------|
| Linkage density        | 10.9255               | 10.7105               | 21.6172               | 5.2812                |
| V-ratio (chigger-host) | 12.3597               | 16.1200               | 33.9133               | 5.4729                |

Bipartite network parameters were calculated using ‘bipartite’ package in R freeware.

**Table S9. Prevalence of *Orientia tsutsugamushi* in small mammals from the Johor and Perak sites**

| Category                       | n          | Number of <i>Orientia</i> infection | Prevalence of infection (%) | [95% CI]           |
|--------------------------------|------------|-------------------------------------|-----------------------------|--------------------|
| <b>Host species</b>            |            |                                     |                             |                    |
| <i>R. argentiventer</i>        | 25         | 2                                   | 8.00                        | 1.4 to 27.5        |
| <i>R. exulans</i>              | 12         | 2                                   | 16.7                        | 2.9 to 49.1        |
| <i>R. tanezumi</i> R3 mitotype | 115        | 18                                  | 15.7                        | 9.8 to 23.9        |
| <i>R. tanezumi</i> s.s.        | 1          | 0                                   | 0                           | 0                  |
| <i>R. tiomanicus</i>           | 21         | 1                                   | 4.8                         | 0.3 to 25.9        |
| <i>T. glis</i>                 | 40         | 2                                   | 5.00                        | 0.9 to 18.2        |
| <b>Host gender</b>             |            |                                     |                             |                    |
| Female                         | 102        | 13                                  | 12.8                        | 7.2 to 21.2        |
| Male                           | 112        | 12                                  | 10.7                        | 5.9 to 18.3        |
| <b>Maturity</b>                |            |                                     |                             |                    |
| Adult                          | 149        | 18                                  | 12.1                        | 7.5 to 18.7        |
| Sub-adult                      | 41         | 6                                   | 14.6                        | 6.1 to 29.9        |
| Juvenile                       | 24         | 1                                   | 4.2                         | 0.2 to 23.1        |
| <b>Habitat type</b>            |            |                                     |                             |                    |
| Forest border                  | 9          | 0                                   | 0                           | 0                  |
| Human dwelling                 | 47         | 4                                   | 8.5                         | 2.8 to 21.3        |
| Paddy field                    | 26         | 2                                   | 7.7                         | 1.3 to 26.6        |
| Plantation                     | 119        | 18                                  | 15.1                        | 9.5 to 23.1        |
| Rubbish dumpsite               | 13         | 1                                   | 7.7                         | 0.4 to 37.9        |
| <b>State</b>                   |            |                                     |                             |                    |
| Johor                          | 99         | 10                                  | 10.1                        | 5.2 to 18.2        |
| Perak                          | 115        | 15                                  | 13.0                        | 7.7 to 20.9        |
| <b>Season</b>                  |            |                                     |                             |                    |
| Dry                            | 123        | 14                                  | 11.4                        | 6.6 to 18.7        |
| Wet                            | 91         | 11                                  | 12.1                        | 6.5 to 21.0        |
| <b>Total</b>                   | <b>214</b> | <b>25</b>                           | <b>11.7</b>                 | <b>7.9 to 16.9</b> |
